# Supplementary material for: Nanoproteomic analysis of ischemia-dependent changes in signaling protein phosphorylation in colorectal normal and cancer tissue
Source: PubMed Central journal article supplement (PMC4705760; doi:10.1186/s12967-015-0752-1), 2016-01-08
Supplement: 12967_2015_752_MOESM2_ESM.pdf [file 12967_2015_752_MOESM2_ESM.pdf]

**EGFR expression - Normal tissue**

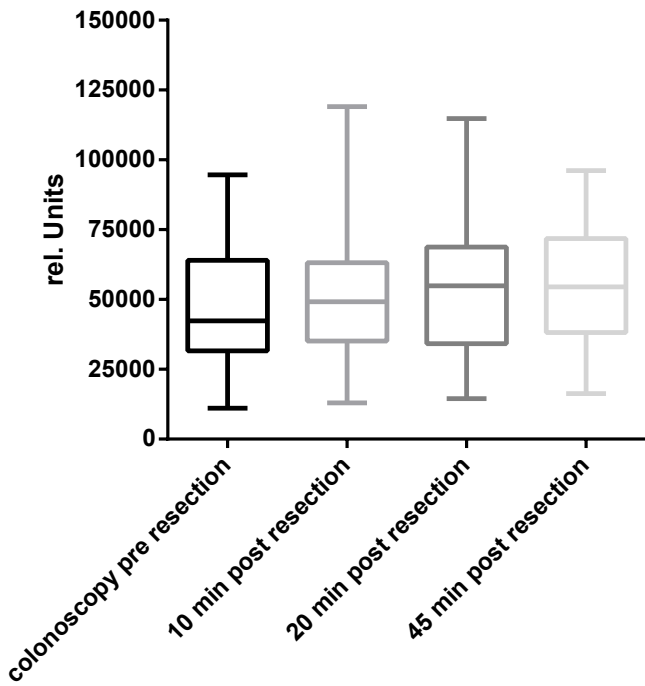

**EGFR expression - Tumor tissue**

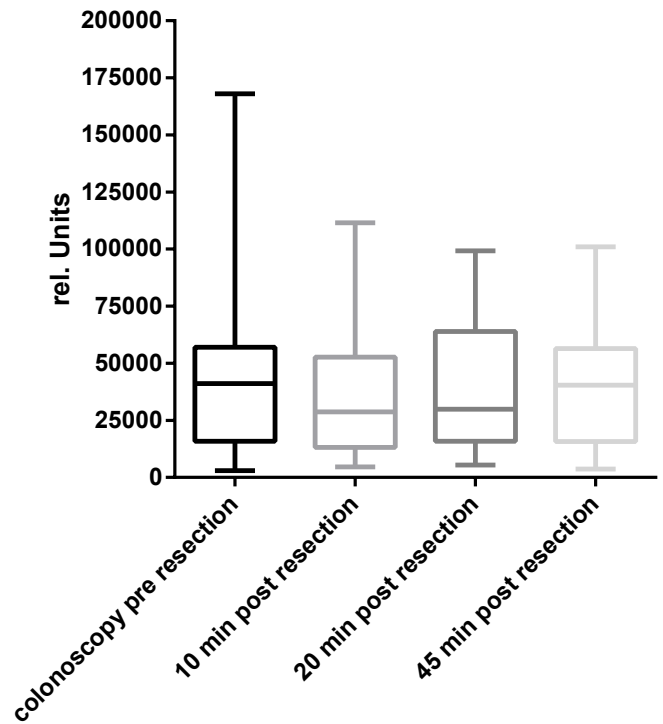

**EGFR phosphorylation - Normal tissue**

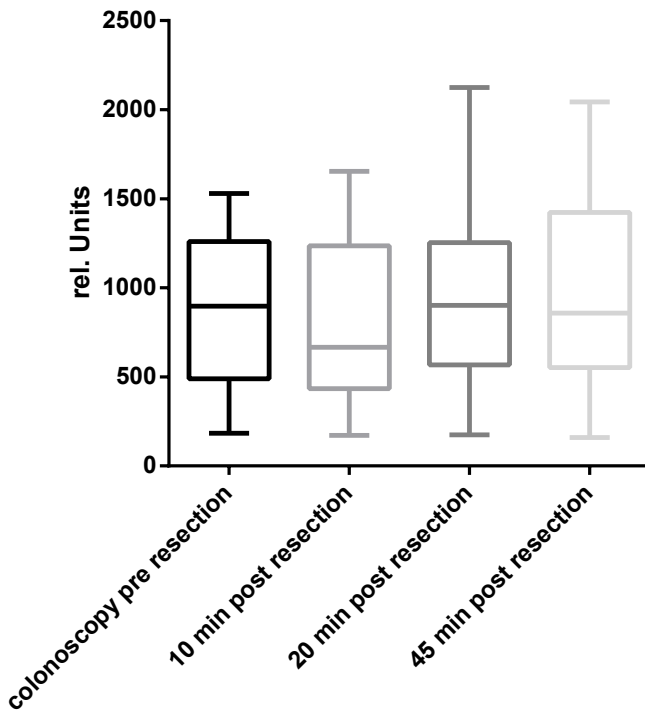

**EGFR phosphorylation - Tumor tissue**

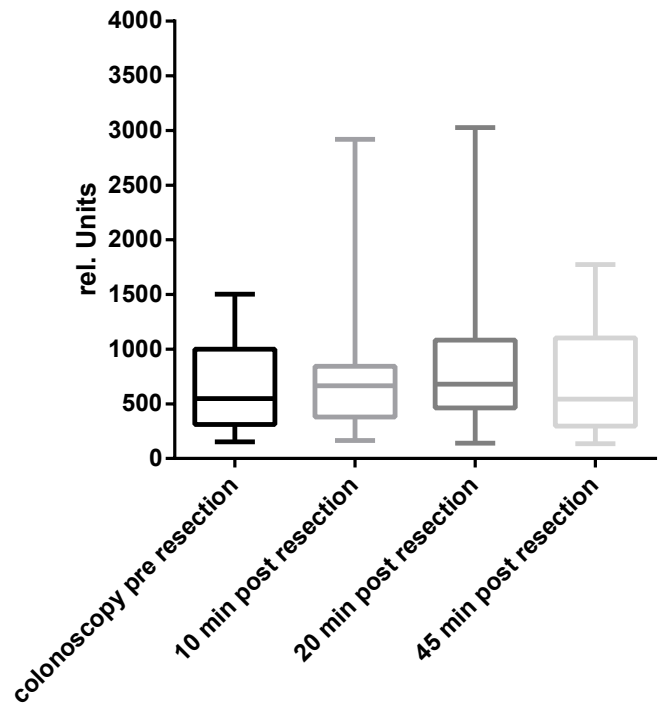

**Additional figure: Unaltered expression and/or phosphorylation of the target signaling protein, EGFR, in response to ischemia.** An overview of ischemia-dependent regulation of EGFR in normal and tumor tissue of all patients, analyzed by the MSD technology, is shown. ANOVA, Kruskal-Wallis test and Dunn test for multiple comparisons were used for statistical analysis. There were no significant changes detected.
